# Supplementary material for: miR-582-3p and miR-582-5p Suppress Prostate Cancer Metastasis to Bone by Repressing TGF-β Signaling
Source: PubMed Central journal article supplement — Mol Ther Nucleic Acids. 2019 Jan 15;16:91–104. doi: 10.1016/j.omtn.2019.01.004 (PMC6409413; doi:10.1016/j.omtn.2019.01.004), 2019-01-15
Supplement: mmc1.pdf [file mmc1.pdf]

## **Supplemental Information**

**miR-582-3p and miR-582-5p Suppress**

**Prostate Cancer Metastasis to Bone**

**by Repressing TGF- $\beta$  Signaling**

**Shuai Huang, Changye Zou, Yubo Tang, Qingde Wa, Xinsheng Peng, Xiao Chen, Chunxiao Yang, Dong Ren, Yan Huang, Zhuangwen Liao, Sheng Huang, Xuenong Zou, and Jincheng Pan**

Supplemental Figure 1

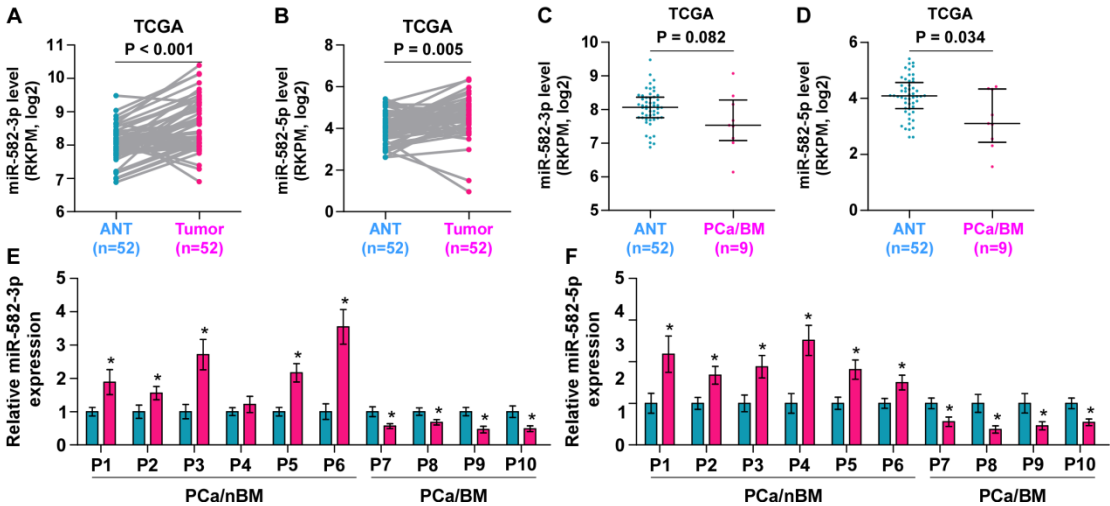

**Supplemental Figure 2**

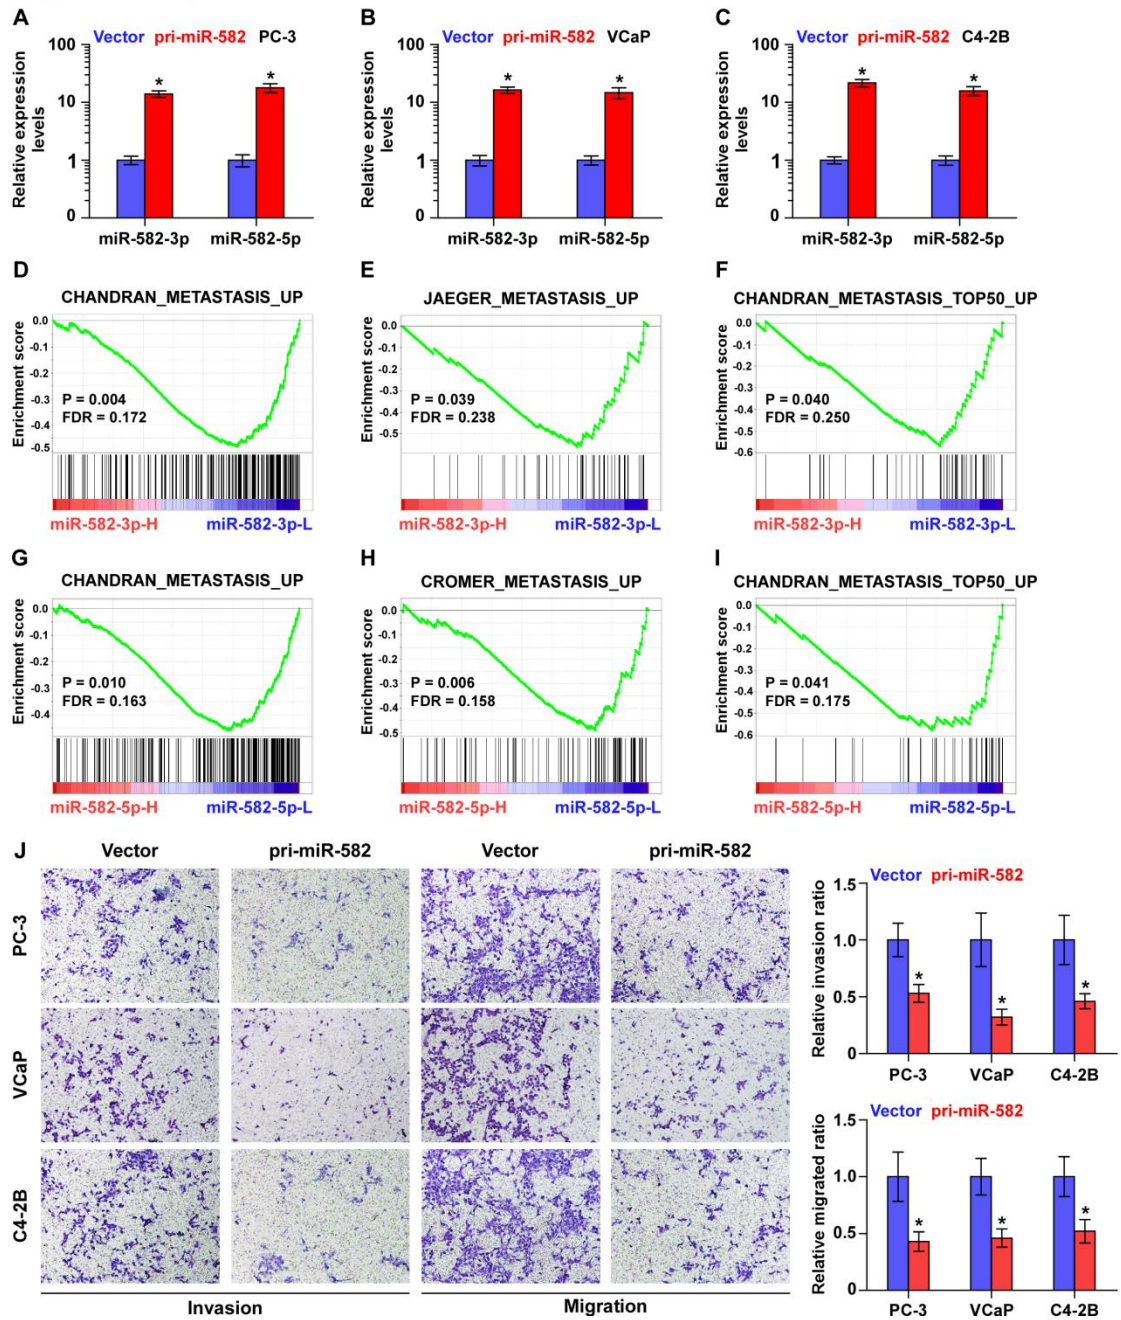

Supplemental Figure 3

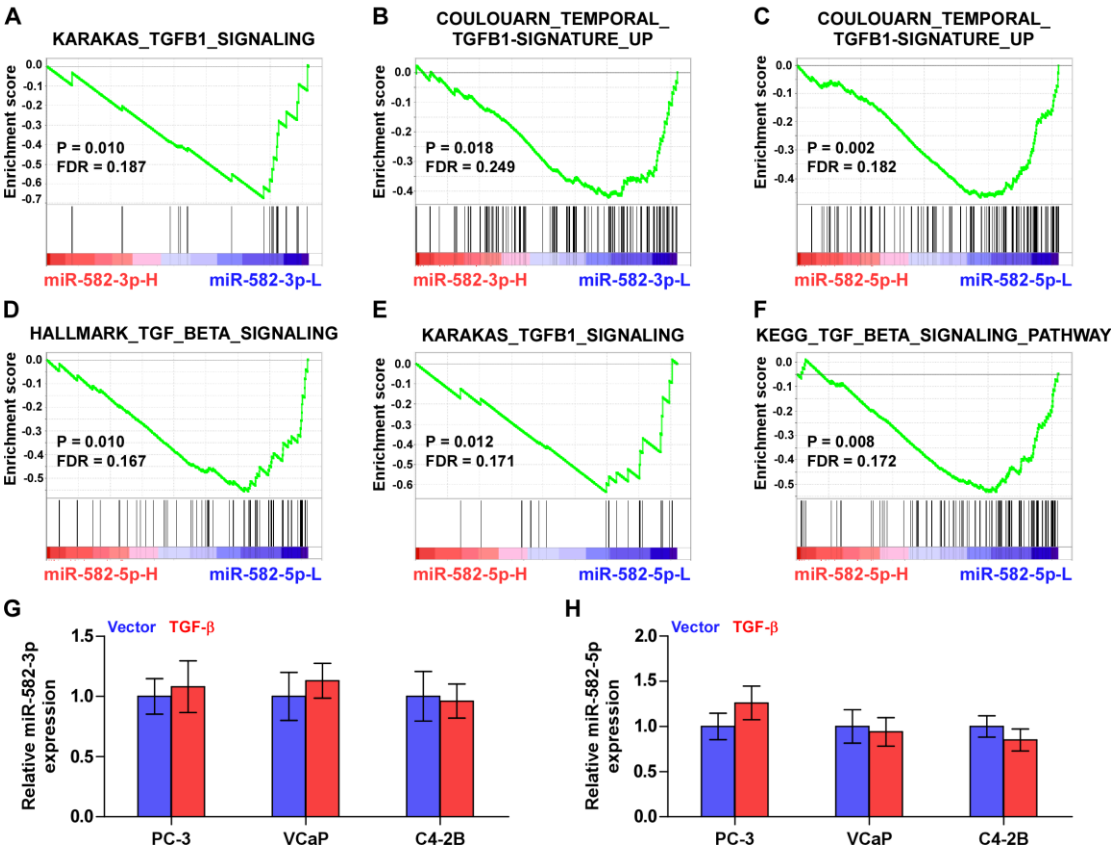

## Supplemental Figure 4

**A**

The prediction of miR-582-3p target genes

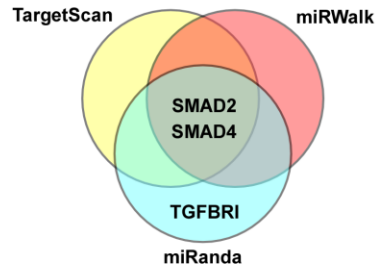

The prediction of miR-582-5p target genes

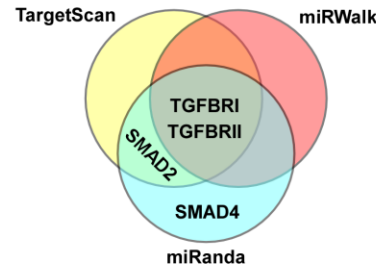

**B**

SMAD2-3'UTR-mut 805: 5' AUUGAUACUGCUGGCACCA**CCCA** 3'  
Hsa-miR-582-3p 3' CCAAGUCAACAAGU-**UGGUCAAU** 5'  
SMAD2-3'UTR-wt 805: 5' AUUGAUACUGCUGGC**ACCAGUUA** 3'

SMAD4-3'UTR-mut 1399: 5' AAUGACAGGCAACAGCC**ACCCC** 3'  
Hsa-miR-582-3p 3' CCAAGUCAACA**GUUGGUCAAU** 5'  
SMAD4-3'UTR-wt 1399: 5' AAUGACAGGCA**ACAGCCAGUUC** 3'

SMAD4-3'UTR-mut 6275: 5' GGUGGGCUGCAGAGCC**ACCCU** 3'  
Hsa-miR-582-3p 3' CCAAGUCAACAAGU**UGGUCAAU** 5'  
SMAD4-3'UTR-wt 6275: 5' GGUGGGCUGCAGAG**CCAGUUU** 3'

SMAD2-3'UTR-mut 3744: 5' AAAGAAAAUUAUACCC**ACCCG** 3'  
Hsa-miR-582-3p 3' CCAAGUCAACAAGU**UGGUCAAU** 5'  
SMAD2-3'UTR-wt 3744: 5' AAAGAAAAUUAUAC**CCAGUUG** 3'

SMAD4-3'UTR-mut 3686: 5' CAAUUACCUCUAAAGCC**ACCCA** 3'  
Hsa-miR-582-3p 3' CCAAGUCAACAAGU**UGGUCAAU** 5'  
SMAD4-3'UTR-wt 3686: 5' CAAUUACCUCUAAAG**CCAGUUA** 3'

TGFBRI-3'UTR-mut 3029: 5' UGCCAGAAACAGUGGC**ACCCG** 3'  
Hsa-miR-582-3p 3' CCAAGUCAACAAGU**UGGUCAAU** 5'  
TGFBRI-3'UTR-wt 3029: 5' UGCCAGAAACAGUG**GCAGUUG** 3'

**C**

SMAD2-3'UTR-mut 1879: 5' AGGAGAUAAACAGGGUACU**CCCC** 3'  
Hsa-miR-582-5p 3' UCAUUGACCAACUUGU**UGACAUAU** 5'  
SMAD2-3'UTR-wt 1879: 5' AGGAGAUAAACAGGGU**ACUGUAC** 3'

SMAD4-3'UTR-mut 1221: 5' AAAAGUUGCAGAUUAUUGACU**CCCC** 3'  
Hsa-miR-582-5p 3' UCAUUGAC-CAAC-UUGU**UGACAUAU** 5'  
SMAD4-3'UTR-wt 1221: 5' AAAAGUUGCAGAUUAUUG**ACUGUAC** 3'

TGFBRII-3'UTR-mut 485: 5' AUGCAGUGGUUCUCUGACU**CCCA** 3'  
Hsa-miR-582-5p 3' UCAUUGACCAACUUGU**UGACAUAU** 5'  
TGFBRII-3'UTR-wt 485: 5' AUGCAGUGGUUCUCUG**ACUGUAA** 3'

SMAD2-3'UTR-mut 3912: 5' ACACAAGACAAUCUUCACU**CCCC** 3'  
Hsa-miR-582-5p 3' UCAUUGACCAACUUGU**UGACAUAU** 5'  
SMAD2-3'UTR-wt 3912: 5' ACACAAGACAAUCUUC**ACUGUAC** 3'

TGFBRI-3'UTR-mut 3979: 5' CAGUUACUCAAAUGGUACU**CCCCU** 3'  
Hsa-miR-582-5p 3' UCAUUGACCAACUUGU**UGACAUAU** 5'  
TGFBRI-3'UTR-wt 3979: 5' CAGUUACUCAAAUGGU**ACUGUAU** 3'

TGFBRII-3'UTR-mut 1322: 5' AGCUGCCUCACUUCUCACU**CCCA** 3'  
Hsa-miR-582-5p 3' UCAUUGACCAACUUGU**UGACAUAU** 5'  
TGFBRII-3'UTR-wt 1322: 5' AGCUGCCUCACUUCUC**ACUGUAA** 3'

Supplemental Figure 5

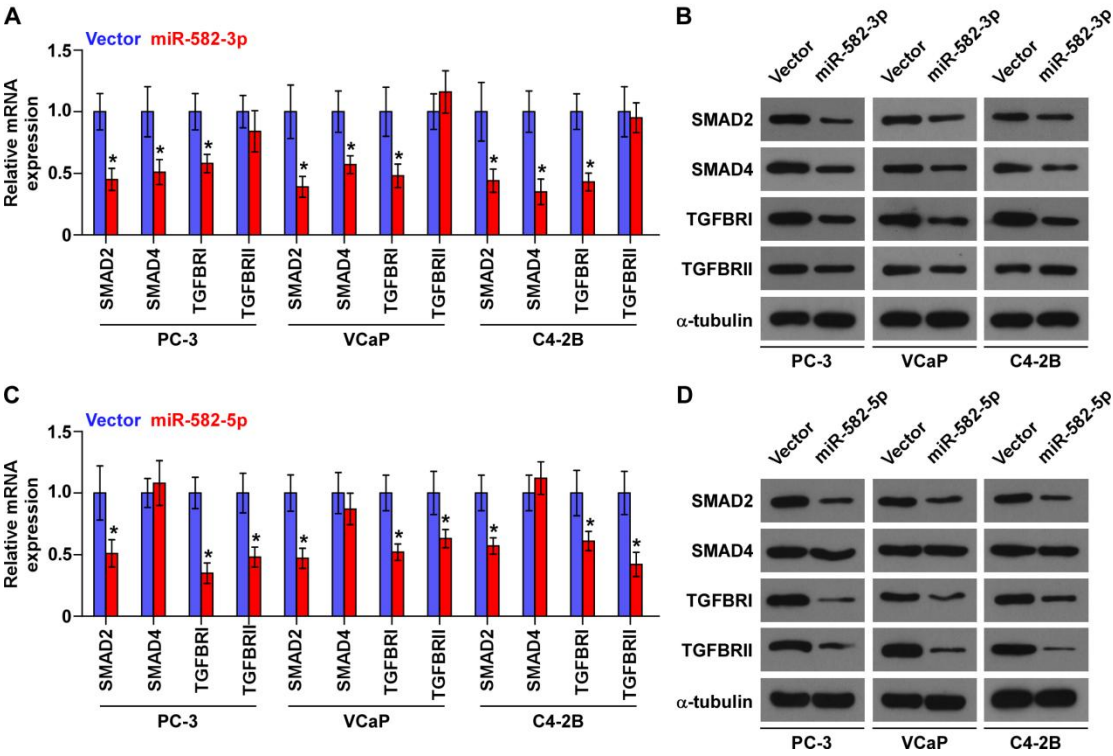

Supplemental Figure 6

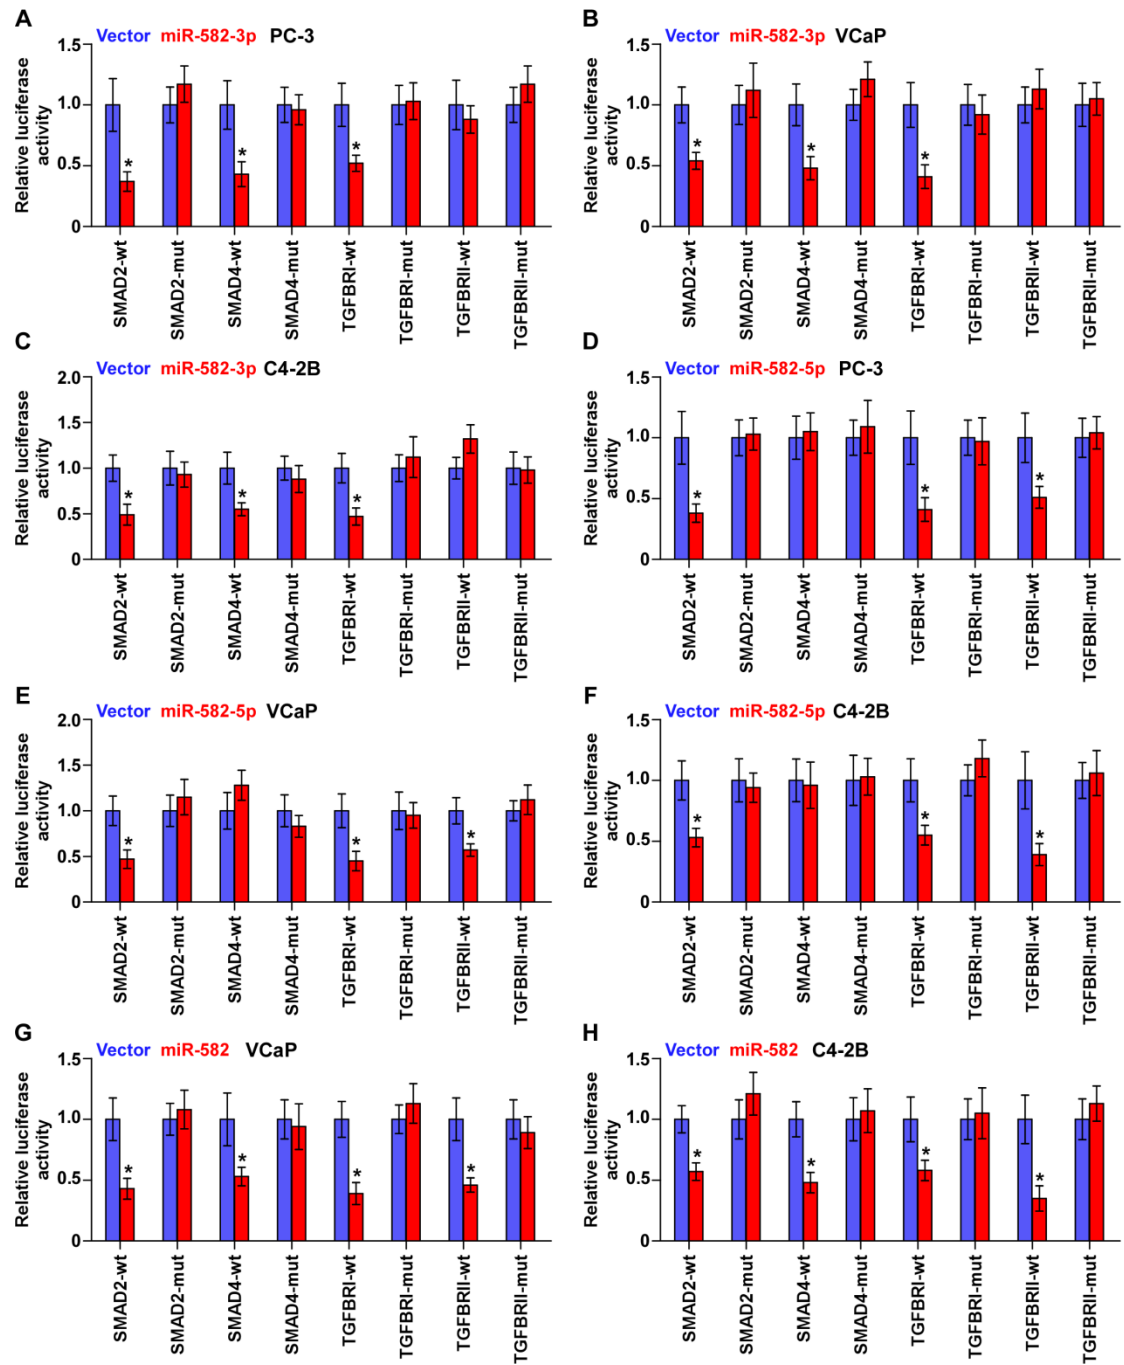

**A** PC-3  
Vector miR-582-3p

Enrichment relative to input (%)

RIP: HA-Ago2 IgG

SMAD2 SMAD4 TGFBRI TGFBRII

**B** VCaP  
Vector miR-582-3p

Enrichment relative to input (%)

RIP: HA-Ago2 IgG

SMAD2 SMAD4 TGFBRI TGFBRII

**C** C4-2B  
Vector miR-582-3p

Enrichment relative to input (%)

RIP: HA-Ago2 IgG

SMAD2 SMAD4 TGFBRI TGFBRII

**D** PC-3  
Vector miR-582-5p

Enrichment relative to input (%)

RIP: HA-Ago2 IgG

SMAD2 SMAD4 TGFBRI TGFBRII

**E** VCaP  
Vector miR-582-5p

Enrichment relative to input (%)

RIP: HA-Ago2 IgG

SMAD2 SMAD4 TGFBRI TGFBRII

**F** C4-2B  
Vector miR-582-5p

Enrichment relative to input (%)

RIP: HA-Ago2 IgG

SMAD2 SMAD4 TGFBRI TGFBRII

**G** VCaP  
Vector miR-582

Enrichment relative to input (%)

RIP: HA-Ago2 IgG

SMAD2 SMAD4 TGFBRI TGFBRII

**H** C4-2B  
Vector miR-582

Enrichment relative to input (%)

RIP: HA-Ago2 IgG

SMAD2 SMAD4 TGFBRI TGFBRII

[illegible]

**Supplemental Figure 9**

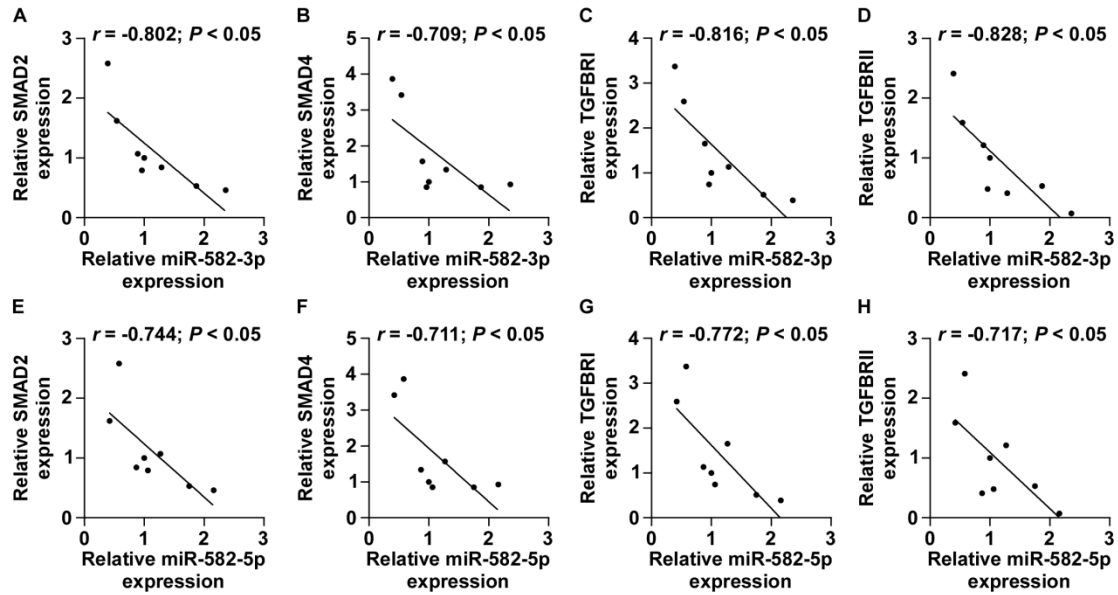

### Supplemental figure legends

**Supplemental Figure 1. (A and B)** miR-582-3p and -5p expression levels was elevated in paired PCa tissues compared with that in the matched adjacent normal tissues (ANT) as assessed by analyzing the PCa miRNA sequencing dataset from TCGA (n = 52). **(C and D)** miR-582-3p and -5p expression levels was reduced in bone metastatic PCa tissues (PCa/BM) compared with that in ANT as assessed by analyzing the PCa miRNA sequencing dataset from TCGA (ANT, n = 52; PCa/BM, n = 9). **(E and F)** Real-time PCR analysis of miR-582-3p and -5p expression in 6 paired non-bone metastatic and 4 paired bone metastatic PCa samples. Transcript levels were normalized to *U6* expression. \* $P < 0.05$ .

**Supplemental Figure 2. (A-C)** Real-time PCR analysis of miR-582-3p and -5p expression in PCa cells transduced with pri-miR-582 compared to the vector controls. Transcript levels were normalized by *U6* expression. Error bars represent the mean  $\pm$  s.d. of three independent experiments. \* $P < 0.05$ . **(D-I)** Gene set enrichment analysis

(GSEA) revealed that low expression of miR-582-3p and -5p significantly and positively correlated with metastatic propensity. **(J)** Overexpression of miR-582-3p and -5p inhibited invasion and migration abilities in PCa cells. Error bars represent the mean  $\pm$  S.D. of three independent experiments.  $*P < 0.05$ .

**Supplemental Figure 3. (A-F)** GSEA revealed that low expression of miR-582-3p and -5p significantly and positively correlated with TGF- $\beta$  signaling. **(G and H)** Real-time PCR analysis of miR-582-3p and -5p expression in PCa cells treated with TGF- $\beta$  (5 ng/ml for 48h). Transcript levels were normalized by U6 expression. Error bars represent the mean  $\pm$  s.d. of three independent experiments.

**Supplemental Figure 4. (A)** Predictive target genes of miR-582-3p and -5p from TargetScan, miRanda and miRWalk. **(B and C)** Predicted miR-582-3p **(B)** or -5p **(C)** targeting wild-type sequences in 3'UTR s of SMAD2, SMAD4, TGFBR1 and TGFBR2.

**Supplemental Figure 5. (A and B)** Real-time PCR and Western blotting analysis of SMAD2, SMAD4, TGFBR1 and TGFBR2 expression in the miR-582-3p mimics-transfecting or vector PCa cells. Transcript levels were normalized by *U6* expression.  $\alpha$ -Tubulin served as the loading control. Error bars represent the mean  $\pm$  s.d. of three independent experiments.  $*P < 0.05$ . **(C and D)** Real-time PCR and Western blotting analysis of SMAD2, SMAD4, TGFBR1 and TGFBR2 expression in the miR-582-5p mimics-transfecting or vector PCa cells. Transcript levels were normalized by *U6* expression.  $\alpha$ -Tubulin served as the loading control. Error bars represent the mean  $\pm$  s.d. of three independent experiments.  $*P < 0.05$ .

**Supplemental Figure 6. (A-C)** Luciferase assay of the cells transfected with pmirGLO-3'UTR reporter of SMAD2, SMAD4, TGFBR1 and TGFBR2 in the miR-582-3p mimics-transfecting or vector PCa cells. Error bars represent the mean  $\pm$  S.D. of three independent experiments.  $*P < 0.05$ . **(D-F)** Luciferase assay of the cells transfected with pmirGLO-3'UTR reporter of SMAD2, SMAD4, TGFBR1 and TGFBR2 in the miR-582-5p mimics-transfecting or vector PCa cells. Error bars represent the mean  $\pm$  S.D. of three independent experiments.  $*P < 0.05$ . **(G and H)** Luciferase assay of the cells transfected with pmirGLO-3'UTR reporter of SMAD2, SMAD4, TGFBR1 and TGFBR2 in the pri-miR-582-transfecting or vector VCaP and C4-2B cells. Error bars represent the mean  $\pm$  S.D. of three independent experiments.  $*P < 0.05$ .

**Supplemental Figure 7. (A-C)** MiRNP IP assay showing the association between miR-582-3p and SMAD2, SMAD4, TGFBR1 and TGFBR2 transcripts in the miR-582-3p mimics-transfecting or vector PCa cells. Pulldown of IgG antibody served as the negative control. Error bars represent the mean  $\pm$  S.D. of three independent experiments.  $*P < 0.05$ . **(D-F)** MiRNP IP assay showing the association between miR-582-5p and SMAD2, SMAD4, TGFBR1 and TGFBR2 transcripts in the miR-582-5p mimics-transfecting or vector PCa cells. Pulldown of IgG antibody served as the negative control. Error bars represent the mean  $\pm$  S.D. of three independent experiments.  $*P < 0.05$ . **(G and H)** MiRNP IP assay showing the association between miR-582-3p and -5p and SMAD2, SMAD4, TGFBR1 and TGFBR2 transcripts in the pri-miR-582-transfecting or vector VCaP and C4-2B

cells. Pulldown of IgG antibody served as the negative control. Error bars represent the mean  $\pm$  S.D. of three independent experiments. \* $P < 0.05$ .

**Supplemental Figure 8. TGF- $\beta$  signaling activity restores invasion and migration abilities in miR-582-3p and -5p-overexpressing PCa cells. (A-C)** Upregulating TGFBR1 or SMAD2 didn't affect TGF- $\beta$  signaling activity (A), invasion (B) and migration (C) abilities in the pri-miR-582-transfecting PCa cells in the absence of TGF- $\beta$ . \* $P < 0.05$ , and n.s. means no significance.

**Supplemental Figure 9. Clinical relevance of miR-582-3p and -5p with SMAD2, SMAD4, TGFBR1 and TGFBR2 in human PCa tissues. (A-D)** Correlation between miR-582-3p levels and SMAD2, SMAD4, TGFBR1 and TGFBR2 expression in PCa tissues. The expression levels of SMAD2, SMAD4, TGFBR1 and TGFBR2 were quantified by densitometry using Image J Software, and normalized to the levels of  $\alpha$ -tubulin. The sample 1 was used as a standard. The relative expressions of miR-582-3p and these proteins were used to perform the correlation analysis. **(E-H)** Correlation between miR-582-5p levels and SMAD2, SMAD4, TGFBR1 and TGFBR2 expression in PCa tissues. The expression levels of SMAD2, SMAD4, TGFBR1 and TGFBR2 were quantified by densitometry using Image J Software, and normalized to the levels of  $\alpha$ -tubulin. The sample 1 was used as a standard. The relative expressions of miR-582-5p and these proteins were used to perform the correlation analysis.

**Supplemental Table 1. The relationship between miR-582-3p and clinicopathological characteristics in 157 patients with prostate cancer.**

| Parameters      | Number of cases | miR-582-3p expression |      | <i>P</i> values |
|-----------------|-----------------|-----------------------|------|-----------------|
|                 |                 | Low                   | High |                 |
| Age (years)     |                 |                       |      |                 |
| ≤76             | 81              | 36                    | 45   | 0.129           |
| >76             | 76              | 43                    | 33   |                 |
| Differentiation |                 |                       |      |                 |
| Well/moderate   | 73              | 41                    | 32   | 0.172           |
| Poor            | 84              | 38                    | 46   |                 |
| Serum PSA       |                 |                       |      |                 |
| <20.3           | 78              | 27                    | 51   | <0.001*         |
| >20.3           | 79              | 52                    | 27   |                 |
| Gleason grade   |                 |                       |      |                 |
| ≤7              | 86              | 29                    | 57   | <0.001*         |
| >7              | 71              | 50                    | 21   |                 |
| Operation       |                 |                       |      |                 |
| TURP            | 65              | 35                    | 30   | 0.126           |
| Needle biopsy   | 68              | 35                    | 33   |                 |
| TURP+PP         | 5               | 4                     | 1    |                 |
| TURP+BO         | 11              | 2                     | 9    |                 |
| BO              | 8               | 3                     | 5    |                 |
| BM-status       |                 |                       |      |                 |
| nBM             | 94              | 33                    | 61   | <0.001*         |
| BM              | 63              | 46                    | 17   |                 |

**Abbreviation: PSA, prostate-specific antigen; TURP, Trans Urethral Resection**

**Prostate; PP, Prior Prostatectomy; BO, Bilateral Orchiectomies; SD, Standard**

**deviation; IHC, Immunological Histological Chemistry; BM, Bone Metastasis.**

**Supplemental Table 2. The relationship between miR-582-5p and clinicopathological characteristics in 157 patients with prostate cancer.**

| Parameters      | Number of cases | miR-582-5p expression |      | <i>P</i> values |
|-----------------|-----------------|-----------------------|------|-----------------|
|                 |                 | Low                   | High |                 |
| Age (years)     |                 |                       |      |                 |
| ≤75             | 81              | 38                    | 43   | 0.378           |
| >75             | 76              | 41                    | 35   |                 |
| Differentiation |                 |                       |      |                 |
| Well/moderate   | 73              | 40                    | 33   | 0.296           |
| Poor            | 84              | 39                    | 45   |                 |
| Serum PSA       |                 |                       |      |                 |
| <20.3           | 78              | 25                    | 53   | <0.001*         |
| >20.3           | 79              | 54                    | 25   |                 |
| Gleason grade   |                 |                       |      |                 |
| ≤7              | 86              | 33                    | 53   | =0.001*         |
| >7              | 71              | 46                    | 25   |                 |
| Operation       |                 |                       |      |                 |
| TURP            | 65              | 34                    | 31   | 0.169           |
| Needle biopsy   | 68              | 36                    | 32   |                 |
| TURP+PP         | 5               | 4                     | 1    |                 |
| TURP+BO         | 11              | 3                     | 8    |                 |
| BO              | 8               | 2                     | 6    |                 |
| BM-status       |                 |                       |      |                 |
| nBM             | 94              | 29                    | 65   | <0.001*         |
| BM              | 63              | 50                    | 13   |                 |

**Abbreviation: PSA, prostate-specific antigen; TURP, Trans Urethral Resection**

**Prostate; PP, Prior Prostatectomy; BO, Bilateral Orchiectomies; SD, Standard**

**deviation; IHC, Immunological Histological Chemistry; BM, Bone Metastasis.**

**Supplemental Table 3. A list of primers used in the reactions for clone PCR.**

| Gene                 | Sequence (5' – 3')                  | Product size |
|----------------------|-------------------------------------|--------------|
| pri-miR-582-clone-F  | CACTTCAGCCTTGAGGTACAAC              | 633 bp       |
| pri-miR-582-clone-R  | CTTCCCAGCTTTGCATCAGAG               |              |
| TGFBRI-3'UTR-2999-F  | AGCAAGGTGGCTCCTGTG                  | 1101 bp      |
| TGFBRI-3'UTR-4099-R  | GGCAGAGATTACACTGATAAAGCC            |              |
| TGFBRII-3'UTR-413-F  | TTTATTGGAGAACTCCAGAACCAAGC          | 997 bp       |
| TGFBRII-3'UTR-1409-R | CCTTGGTTAGGTGCAGATTTAATTC           |              |
| SMAD2-3'UTR-618-F    | TGTTTCAGTGGGGCTTAAACAGTC            | 272 bp       |
| SMAD2-3'UTR-886-R    | CCCAAAGACGGGCATAAGACAAAGGGACTTTC    |              |
| SMAD2-3'UTR-1787-F   | CTTATGCCCCGTCTTTGGGTAAAGGTGAACAAGAC | 158 bp       |
| SMAD2-3'UTR-1927-R   | AAGTGAAATGAAGCATCCCATCTGTTATTCTCC   |              |
| SMAD2-3'UTR-3642-F   | GGATGCTTCATTTCACTTTTTTTGTGCCCTTGTC  | 368 bp       |
| SMAD2-3'UTR-4000-R   | GAGGGAAGGCGCAAATTGG                 |              |
| SMAD4-3'UTR-1184-F   | TCAATTGGCAGTGACTTTGTATAGAG          | 321 bp       |
| SMAD4-3'UTR-1495-R   | AACGAAGGGACTCTACACATGATACACAATGTCC  |              |
| SMAD4-3'UTR-3588-F   | GTGTAGAGTCCCTTCGTTATTGCCAACTTTAC    | 215 bp       |
| SMAD4-3'UTR-3785-R   | AACTCCATGACAAGATGGATTCTGCCTTTACG    |              |
| SMAD4-3'UTR-6175-F   | CCATCTTGTCATGGAGTTGGCAAACCTTTCTTC   | 236 bp       |
| SMAD4-3'UTR-6401-R   | TCTTCTCTGGCTTCTGGCATAG              |              |

**Supplemental Table 4. A list of primers used in the reactions for real-time  
RT-PCR.**

| <b>Primer</b> |                             |
|---------------|-----------------------------|
| TGFBRI-up     | CACAGAGTGGGAACAAAAAGGT      |
| TGFBRI-dn     | CCAATGGAACATCGTCGAGCA       |
| TGFBRII-up    | AAGATGACCGCTCTGACATCA       |
| TGFBRII-dn    | CTTATAGACCTCAGCAAAGCGAC     |
| SMAD2-up      | CACGCTAGGAAAACAGCCTC        |
| SMAD2-dn      | TCGGAAGAGGAAGGAACAAA        |
| SMAD4-up      | TTGATCCTTTGGAAACAGTGAA      |
| SMAD4-dn      | GCCTTCCCACTCCCCCTC          |
| NEDD9 -up     | CTACAGGGTAAGGAGGAGTTT       |
| NEDD9-dn      | TGGGTCTCACATTGGTCAT         |
| CTGF-up       | GCTACCACATTTCCTACCTAGAAATCA |
| CTGF-dn       | GACAGTCCGTCAAAACAGATTGTT    |
| PTHRP-up      | ACTCGCTCTGCCTGGTTAGA        |
| PTHRP-dn      | GGAGGTGTCAGACAGGTGGT        |
| MMP13-up      | AACATCCAAAAACGCCAGAC        |
| MMP13-dn      | GGAAGTTCTGGCCAAAATGA        |
| ADAM19-up     | TTTCTCAGAACAGCGGGACT        |
| ADAM19-dn     | TGTTGATCACCTTTCGCTTG        |
| THBS1-up      | TTGTCTTTGGAACCACACCA        |
| THBS1-dn      | TTGTCAAGGGTGAGGAGGAC        |
| COL1A1-up     | CCTGGATGCCATCAAAGTCT        |
| COL1A1-dn     | CGCCATACTCGAACTGGAAT        |
| VEGFA-up      | AAGGAGGAGGGCAGAATCAT        |
| VEGFA-dn      | CACACAGGATGGCTTGAAGA        |
| IL11-up       | TGAAGACTCGGCTGTGACC         |
| IL11-dn       | CCTCACGGAAGGACTGTCTC        |
| GAPDH-up      | ATTCCACCCATGGCAAATTC        |
| GAPDH-dn      | TGGGATTTCCATTGATGACAAG      |

**Supplemental Table 5. The clinicopathological characteristics in 157 patients  
with prostate cancer**

| Parameters                               | Number of cases |
|------------------------------------------|-----------------|
| Age (years)                              |                 |
| $\leq 76$                                | 81              |
| $> 76$                                   | 76              |
| Differentiation                          |                 |
| Well/moderate                            | 73              |
| Poor                                     | 84              |
| Serum PSA at diagnosis, $\mu\text{g/mL}$ |                 |
| $< 20.3$                                 | 78              |
| $> 20.3$                                 | 79              |
| Gleason grade                            |                 |
| $\leq 7$                                 | 86              |
| $> 7$                                    | 71              |
| Operation                                |                 |
| TURP                                     | 65              |
| Needle biopsy                            | 68              |
| TURP+PP                                  | 5               |
| TURP+BO                                  | 11              |
| BO                                       | 8               |
| miR-582-3p expression                    |                 |
| $\leq 4.04$                              | 79              |
| $> 4.04$                                 | 78              |
| miR-582-5p expression                    |                 |
| $\leq 3.88$                              | 79              |
| $> 3.88$                                 | 78              |
| BM-status                                |                 |
| BM-free                                  | 94              |
| BM                                       | 63              |

**Abbreviation: PSA, prostate-specific antigen; TURP, Trans Urethral Resection Prostate; PP, Prior Prostatectomy; BO, Bilateral Orchiectomies; SD, Standard deviation; IHC, Immunological Histological Chemistry; BM, Bone Metastasis.**
